# Supplementary material for: Germplasm Screening Using DNA Markers and Genome-Wide Association Study for the Identification of Powdery Mildew Resistance Loci in Tomato
Source: MDPI journal article supplement (doi:10.3390/ijms232113610), 2022-11-06
Supplement: s1 [file s1]

Table S8. Tomato reference genome assembly information used for similarity analysis with SNP chip probe sequence.

| Species type       | Species name               | Assembly name | NCBI GenBank accession |
|--------------------|----------------------------|---------------|------------------------|
| Cultivated species | <i>S. lycopersicum</i>     | SL2.40        | GCA_000188115.1        |
| Wild species       | <i>S. chilense</i>         | ASM601370v1   | GCA_006013705.1        |
|                    | <i>S. habrochaites</i>     | Sohab10       | GCA_000577655.1        |
|                    | <i>S. pennellii</i>        | SPENNV200     | GCF_001406875.1        |
|                    | <i>S. pimpinellifolium</i> | ASM1496433v1  | GCA_014964335.1        |
|                    | <i>S. arcanum</i>          | Sorac 10      | GCA_000612985.1        |
