# Supplementary material for: Germplasm Screening Using DNA Markers and Genome-Wide Association Study for the Identification of Powdery Mildew Resistance Loci in Tomato
Source: MDPI journal article supplement (doi:10.3390/ijms232113610), 2022-11-06
Supplement: s1 [file s1]

Table S5. Genotypes in 290 tomato accessions for nine single nucleotide polymorphisms (SNPs) identified to be significantly associated with powdery mildew resistance (PMR) in the genome-wide association study (GWAS).

| Pheno type | Accession | PDI (%) | SNPs                     |             |             |             |             |             |             |             |             |
|------------|-----------|---------|--------------------------|-------------|-------------|-------------|-------------|-------------|-------------|-------------|-------------|
|            |           |         | AX-95811257 <sup>a</sup> | AX-95803738 | AX-95799308 | AX-95776428 | AX-95771531 | AX-95783448 | AX-95813371 | AX-95810925 | AX-95801454 |
| R          | KNU17     | 0.00    | T                        | T           | G           | C           | C           | A           | G           | G           | G           |
| R          | A1162     | 0.00    | Y                        | C           | A           | T           | T           | C           | A           | A           | G           |
| R          | A1161     | 0.00    | T                        | C           | A           | T           | T           | C           | R           | A           | G           |
| R          | A1216     | 0.00    | T                        | C           | A           | T           | T           | C           | G           | A           | A           |
| R          | LA1963    | 0.00    | C                        | T           | A           | Y           | T           | N           | R           | R           | R           |
| R          | LA2932    | 0.00    | C                        | Y           | A           | Y           | Y           | M           | R           | R           | R           |
| R          | LA2663    | 0.00    | C                        | C           | A           | N           | Y           | M           | R           | R           | R           |
| R          | LA1274    | 0.00    | C                        | Y           | A           | N           | T           | M           | G           | N           | N           |
| R          | LA1141    | 0.00    | C                        | Y           | A           | T           | T           | C           | G           | A           | G           |
| R          | PI126445  | 0.00    | C                        | Y           | R           | T           | Y           | M           | G           | R           | R           |
| R          | LA1809    | 0.00    | C                        | N           | G           | T           | T           | C           | G           | A           | R           |
| R          | LA1674    | 0.00    | C                        | Y           | R           | T           | T           | M           | G           | R           | N           |
| R          | LA1272    | 0.00    | C                        | Y           | A           | T           | T           | N           | N           | R           | R           |
| R          | LA2744    | 0.00    | C                        | Y           | A           | Y           | N           | M           | G           | R           | R           |
| R          | LA2181    | 0.00    | C                        | T           | A           | T           | T           | C           | G           | A           | G           |
| R          | KNU16     | 4.76    | T                        | T           | G           | C           | C           | A           | G           | G           | G           |
| R          | LA0716    | 4.76    | C                        | T           | G           | T           | T           | M           | G           | A           | N           |
| R          | LA1340    | 5.56    | C                        | T           | G           | T           | T           | M           | G           | A           | R           |
| R          | LA2184    | 5.56    | Y                        | Y           | A           | T           | T           | C           | G           | A           | G           |
| R          | PI308182  | 6.67    | C                        | Y           | R           | T           | Y           | M           | G           | R           | R           |

|    |          |       |   |   |   |   |   |   |   |   |   |
|----|----------|-------|---|---|---|---|---|---|---|---|---|
| R  | PI134418 | 8.33  | C | Y | R | T | Y | N | G | R | R |
| R  | A1164    | 9.52  | Y | C | A | T | T | C | G | A | G |
| MR | A1168    | 11.11 | C | C | A | T | T | C | G | R | G |
| MR | A1155    | 11.11 | T | C | A | T | T | C | G | A | G |
| MR | LA2852   | 11.11 | C | C | A | Y | Y | C | G | A | G |
| MR | A1189    | 12.50 | T | C | A | T | T | C | G | A | G |
| MR | A1170    | 13.33 | T | C | A | T | Y | C | G | A | G |
| MR | LA0722   | 13.33 | C | C | A | T | T | C | G | A | G |
| MR | LA1461   | 14.29 | T | T | G | C | C | A | G | G | G |
| MR | PI180721 | 14.81 | C | T | G | C | C | A | G | G | A |
| MR | A1169    | 16.67 | T | C | A | T | Y | C | G | A | G |
| MR | A1165    | 16.67 | T | C | N | T | Y | C | G | A | G |
| MR | LA1777   | 16.67 | C | T | G | T | T | C | G | A | N |
| MR | LA0407   | 16.67 | C | Y | R | T | Y | C | G | R | R |
| MR | PI134417 | 16.67 | C | Y | R | T | Y | N | G | R | R |
| MR | LA2312   | 19.05 | C | C | A | T | T | C | G | A | A |
| MR | A1156    | 19.05 | T | C | A | T | T | C | G | A | G |
| MR | LA1457   | 20.00 | C | C | A | T | T | C | G | G | G |
| MR | A1151    | 20.00 | T | C | A | T | T | C | G | A | R |
| MR | LA2185   | 20.00 | C | C | A | T | T | M | R | R | R |
| MR | BT0911   | 20.83 | T | Y | N | Y | Y | C | G | A | G |
| MR | PI205037 | 22.22 | T | T | G | C | C | A | A | A | G |
| MR | KNU11    | 22.22 | T | C | A | T | T | M | G | G | G |
| MR | A1173    | 22.22 | T | C | A | T | T | C | G | A | G |
| MR | A1167    | 22.22 | T | C | A | T | Y | C | G | A | G |

|    |           |       |   |   |   |   |   |   |   |   |   |
|----|-----------|-------|---|---|---|---|---|---|---|---|---|
| MR | A1217     | 22.22 | T | C | A | T | Y | C | G | A | G |
| MR | A1206     | 22.22 | T | C | A | T | T | C | G | A | A |
| MR | A1208     | 22.22 | T | C | A | T | T | C | G | A | A |
| MR | LA1582    | 22.22 | C | Y | A | T | T | C | G | A | G |
| MR | A1236     | 23.33 | T | C | A | T | T | C | G | A | G |
| MR | A1248     | 25.00 | C | C | A | T | T | C | G | A | G |
| MR | AVTO98039 | 25.00 | C | C | A | T | T | C | A | A | G |
| MR | A1234     | 25.93 | T | C | A | T | T | C | G | A | A |
| MR | A1260     | 26.67 | T | C | N | T | T | C | G | A | G |
| MR | LA1455    | 27.78 | C | T | G | C | C | A | G | G | G |
| MR | A1198     | 27.78 | T | C | A | T | T | C | G | A | A |
| MR | LA2779    | 27.78 | C | Y | A | N | T | N | R | R | R |
| MR | LA1246    | 27.78 | C | C | A | T | T | C | G | A | G |
| MR | A1222     | 28.57 | T | C | A | T | T | C | G | A | G |
| MR | A1219     | 29.17 | T | C | A | T | T | C | G | A | G |
| MR | A1163     | 29.17 | Y | C | A | T | T | C | G | A | G |
| MR | A1247     | 29.17 | T | C | A | T | T | C | A | A | A |
| MR | LA4245    | 29.17 | T | C | A | T | T | C | N | A | G |
| MR | A1227     | 29.17 | T | C | A | T | T | C | G | A | A |
| MR | A1246     | 29.17 | C | C | A | T | T | C | G | A | G |
| MR | LA1028    | 29.17 | C | C | A | T | Y | N | R | R | R |
| MR | LA1941    | 29.17 | C | T | G | T | T | C | G | A | G |
| MR | LA1578    | 29.17 | C | C | A | T | T | C | G | A | G |
| MR | A1215     | 29.63 | T | C | A | T | T | C | G | A | A |
| S  | LA2626    | 33.33 | C | C | A | T | T | C | G | A | G |

|   |          |       |   |   |   |   |   |   |   |   |   |
|---|----------|-------|---|---|---|---|---|---|---|---|---|
| S | LA1512   | 33.33 | C | C | A | T | T | C | A | G | G |
| S | LA2308   | 33.33 | Y | C | R | T | T | M | G | G | R |
| S | PI254655 | 33.33 | C | C | R | N | T | M | A | G | A |
| S | A1157    | 33.33 | T | C | A | T | T | C | G | A | G |
| S | BT0902   | 33.33 | C | C | A | T | T | C | A | A | G |
| S | A1199    | 33.33 | T | C | N | T | T | C | G | A | A |
| S | A1243    | 33.33 | T | C | A | T | T | C | A | A | G |
| S | BT0912   | 33.33 | T | C | A | T | T | C | G | A | G |
| S | A1237    | 33.33 | T | C | A | T | T | C | G | A | G |
| S | A1223    | 33.33 | T | C | A | T | T | C | G | A | A |
| S | LA1406   | 33.33 | N | Y | A | T | T | C | G | A | G |
| S | LA1930   | 33.33 | C | Y | A | Y | T | M | R | A | R |
| S | LA1946   | 33.33 | C | C | G | T | T | M | G | A | R |
| S | LA2533   | 33.33 | Y | C | A | T | T | C | G | A | G |
| S | A1245    | 36.67 | T | C | A | T | T | C | A | A | G |
| S | A1207    | 36.67 | T | C | A | T | T | C | G | A | G |
| S | A1244    | 37.04 | T | C | A | T | T | C | A | A | G |
| S | A1254    | 37.50 | T | C | A | T | T | C | G | A | G |
| S | LA1912   | 37.50 | C | T | A | T | T | N | G | A | R |
| S | LA3875   | 38.10 | T | T | G | C | C | A | A | G | A |
| S | A1195    | 38.10 | T | C | A | T | T | C | G | A | A |
| S | A1187    | 38.10 | T | C | A | T | T | C | G | A | G |
| S | A1218    | 38.10 | T | C | N | T | T | C | G | A | A |
| S | LA1208   | 38.89 | T | C | R | T | T | N | A | A | A |
| S | LA2845   | 38.89 | C | C | A | T | T | C | G | A | G |

|   |          |       |   |   |   |   |   |   |   |   |   |
|---|----------|-------|---|---|---|---|---|---|---|---|---|
| S | A1270    | 38.89 | T | C | A | T | T | C | G | A | A |
| S | LA0172   | 40.00 | C | C | A | T | T | C | A | G | G |
| S | A1261    | 40.00 | T | C | A | T | T | C | G | A | A |
| S | A1160    | 40.00 | C | C | A | T | Y | C | G | A | G |
| S | A1258    | 40.74 | T | C | A | T | T | C | A | A | G |
| S | LA2561   | 40.74 | C | Y | G | T | Y | M | R | A | R |
| S | A1205    | 41.67 | T | C | A | T | T | C | G | A | G |
| S | A1226    | 41.67 | T | C | A | T | T | C | G | A | G |
| S | LA1338   | 42.86 | C | C | A | T | T | C | R | N | R |
| S | BT0909   | 42.86 | C | C | A | T | T | C | A | A | G |
| S | A1191    | 42.86 | T | C | A | T | T | C | G | A | G |
| S | LA1228   | 42.86 | T | C | A | T | T | M | A | G | A |
| S | LA1701   | 44.44 | T | Y | R | Y | T | M | G | A | A |
| S | LA4239   | 44.44 | T | C | A | T | T | C | A | A | G |
| S | PI128216 | 44.44 | C | C | A | T | T | C | G | A | G |
| S | LA1732   | 44.44 | C | Y | G | T | T | N | G | A | R |
| S | LA1668   | 45.83 | T | T | G | C | C | A | G | G | G |
| S | A1238    | 45.83 | T | C | A | T | T | C | G | A | G |
| S | A1211    | 46.67 | T | C | A | T | T | C | G | A | A |
| S | A1152    | 46.67 | T | C | A | T | Y | C | G | A | G |
| S | A1225    | 46.67 | T | C | A | T | T | C | G | A | G |
| S | Walter   | 46.67 | C | C | A | T | T | C | G | A | A |
| S | A1159    | 47.62 | C | C | A | T | Y | C | G | A | G |
| S | A1283    | 48.15 | C | C | A | T | T | C | A | A | G |
| S | LA2633   | 50.00 | C | C | A | T | T | C | G | G | G |

|   |          |       |   |   |   |   |   |   |   |   |   |
|---|----------|-------|---|---|---|---|---|---|---|---|---|
| S | A1228    | 50.00 | C | C | A | T | T | C | G | A | G |
| S | A1209    | 50.00 | T | C | A | T | T | C | A | A | G |
| S | A1175    | 50.00 | T | C | A | T | T | C | G | A | G |
| S | Floradel | 50.00 | C | C | A | T | T | C | G | A | A |
| S | LA4230   | 50.00 | T | C | A | T | T | C | A | A | G |
| S | A1196    | 50.00 | Y | C | A | T | T | C | G | A | N |
| S | PI126925 | 50.00 | C | C | A | T | T | C | G | A | G |
| S | SAL1875  | 50.00 | C | N | A | N | Y | C | G | A | G |
| S | LA4024   | 51.85 | T | C | A | T | T | C | G | A | G |
| S | A1289    | 51.85 | C | C | A | T | T | C | G | A | G |
| S | A1193    | 51.85 | C | C | A | T | T | C | G | A | G |
| S | LA4247   | 52.38 | T | C | N | T | T | C | A | A | G |
| S | LA1712   | 54.17 | T | C | A | T | T | C | A | A | G |
| S | A1212    | 54.17 | T | C | A | T | T | C | R | A | A |
| S | LA1464   | 55.56 | T | C | A | T | T | C | G | A | G |
| S | LA4244   | 55.56 | T | C | A | T | T | C | A | A | G |
| S | A1354    | 55.56 | T | C | A | T | T | C | G | A | G |
| S | A1287    | 55.56 | T | C | A | T | T | C | G | A | G |
| S | A1180    | 55.56 | C | C | A | T | Y | C | G | A | G |
| S | LA0446   | 55.56 | C | Y | A | T | T | M | N | A | N |
| S | A1262    | 56.67 | C | C | A | T | Y | C | G | A | G |
| S | A1315    | 56.67 | T | C | A | T | T | C | G | A | G |
| S | LA1542   | 57.14 | C | C | A | T | T | C | G | G | G |
| S | LA3136   | 57.14 | C | C | N | N | T | N | G | G | A |
| S | A1172    | 57.14 | T | C | A | T | N | C | G | A | G |

|   |        |       |   |   |   |   |   |   |   |   |   |
|---|--------|-------|---|---|---|---|---|---|---|---|---|
| S | A1312  | 58.33 | T | C | A | T | T | C | A | A | G |
| S | A1356  | 58.33 | T | C | A | T | T | C | G | A | G |
| S | LA4271 | 58.33 | T | C | A | T | T | C | A | A | G |
| S | LA4279 | 58.33 | T | C | A | T | T | C | A | A | G |
| S | A1263  | 58.33 | T | C | A | T | T | C | G | A | G |
| S | A1255  | 60.00 | T | C | A | T | T | C | G | A | G |
| S | A1314  | 60.00 | T | C | A | T | T | C | A | A | G |
| S | A1259  | 61.11 | T | C | A | T | T | C | A | A | G |
| S | LA1589 | 61.11 | C | C | A | T | T | C | G | A | G |
| S | LA1621 | 61.90 | C | T | G | C | N | M | G | A | G |
| S | LA3043 | 61.90 | C | C | A | T | T | C | A | A | G |
| S | A1231  | 61.90 | T | C | A | T | T | C | G | A | G |
| S | A1269  | 61.90 | C | C | A | T | Y | C | G | A | G |
| S | LA0373 | 61.90 | C | C | A | T | T | C | G | A | G |
| S | LA1545 | 62.96 | C | C | A | T | T | C | G | G | G |
| S | A1252  | 62.96 | T | C | A | T | T | C | G | A | G |
| S | A1233  | 62.96 | T | C | A | T | T | C | G | A | G |
| S | A1281  | 62.96 | C | C | A | T | T | C | G | A | A |
| S | A1158  | 62.96 | T | C | A | T | T | C | G | A | G |
| S | LA1569 | 66.67 | C | C | A | T | T | C | G | G | A |
| S | LA1623 | 66.67 | C | C | A | T | T | C | G | G | G |
| S | LA1456 | 66.67 | C | C | A | T | T | C | G | G | G |
| S | A1232  | 66.67 | C | C | A | T | T | C | G | A | G |
| S | A1275  | 66.67 | T | C | A | T | T | C | A | A | G |
| S | A1257  | 66.67 | T | C | A | T | T | C | G | A | G |

|   |                   |       |   |   |   |   |   |   |   |   |   |
|---|-------------------|-------|---|---|---|---|---|---|---|---|---|
| S | LA3882            | 66.67 | T | C | A | T | T | N | G | A | G |
| S | A1349             | 66.67 | C | C | A | T | T | C | G | A | G |
| S | A1224             | 66.67 | T | C | A | T | T | C | A | A | G |
| S | PI126434          | 66.67 | C | Y | A | T | T | M | G | A | G |
| S | LA3892            | 70.00 | T | C | A | T | T | C | A | A | G |
| S | LA1654            | 70.37 | C | C | A | T | T | C | G | G | R |
| S | A1256             | 70.37 | T | C | A | T | Y | C | G | A | G |
| S | A1355             | 70.37 | T | C | A | T | T | C | G | A | G |
| S | LA3878            | 70.37 | T | C | A | T | T | C | A | A | G |
| S | A1230             | 71.43 | C | C | A | T | T | C | G | A | G |
| S | A1353             | 72.22 | T | C | A | T | T | C | A | A | G |
| S | A1203             | 72.22 | T | C | A | T | T | C | G | A | G |
| S | A1229             | 72.22 | T | C | A | T | T | C | G | A | G |
| S | A1276             | 73.33 | T | C | N | T | T | C | A | A | G |
| S | LA2126A           | 74.07 | C | C | A | T | T | C | G | A | G |
| S | King<br>Humbert#1 | 75.00 | T | C | A | T | T | C | A | G | G |
| S | PI296363          | 75.00 | T | C | R | Y | T | M | G | A | R |
| S | LA3999            | 75.00 | T | C | A | T | T | C | G | A | G |
| S | Trujillo          | 76.67 | T | C | A | T | T | C | A | A | R |
| S | LA1549            | 77.78 | C | C | A | T | T | C | G | G | A |
| S | LA1632            | 77.78 | C | C | A | T | T | C | A | G | G |
| S | 2K6-8040          | 77.78 | T | C | A | T | T | C | G | A | G |
| S | A1357             | 77.78 | C | C | A | T | T | C | A | A | G |
| S | A1333             | 80.00 | T | C | A | T | T | C | A | A | G |
| S | A1240             | 80.00 | T | C | A | T | T | C | G | A | G |

|   |        |       |   |   |   |   |   |   |   |   |   |
|---|--------|-------|---|---|---|---|---|---|---|---|---|
| S | LA1346 | 80.00 | C | C | A | Y | T | M | R | A | G |
| S | LA3918 | 80.95 | T | C | A | T | T | C | G | A | G |
| S | LA3997 | 80.95 | T | C | A | T | T | C | G | A | G |
| S | LA3928 | 80.95 | Y | C | A | T | T | C | R | N | G |
| S | A1241  | 81.48 | T | C | A | T | T | C | G | A | G |
| S | LA4264 | 81.48 | T | C | A | T | T | C | A | A | G |
| S | A1308  | 81.48 | C | C | A | T | T | C | A | A | G |
| S | A1313  | 83.33 | C | C | A | T | T | C | A | A | G |
| S | A1267  | 83.33 | C | C | A | T | Y | C | G | A | G |
| S | LA1283 | 83.33 | C | N | A | T | T | M | R | A | G |
| S | A1296  | 85.19 | T | C | A | T | T | C | G | A | G |
| S | LA2664 | 85.71 | C | C | A | T | T | C | G | A | A |
| S | LA1953 | 86.67 | C | C | A | T | T | C | A | G | A |
| S | A1336  | 86.67 | T | C | A | T | T | C | A | A | G |
| S | LA3975 | 86.67 | T | C | A | T | T | C | G | A | G |
| S | LA2137 | 87.50 | C | C | A | T | T | C | G | A | G |
| S | A1316  | 87.50 | C | C | A | T | T | C | A | A | G |
| S | A1264  | 87.50 | T | C | A | T | T | C | G | A | G |
| S | LA3869 | 88.89 | T | C | A | T | T | C | A | A | G |
| S | A1265  | 88.89 | T | C | N | T | T | C | A | A | G |
| S | A1210  | 88.89 | T | C | A | T | T | C | G | A | G |
| S | A1280  | 88.89 | C | C | A | T | T | C | G | A | A |
| S | A1350  | 90.00 | T | C | A | T | T | C | G | A | G |
| S | LA3047 | 90.48 | C | C | A | T | T | C | A | A | G |
| S | LA2135 | 91.67 | C | T | A | Y | T | M | A | A | A |

|   |          |       |   |   |   |   |   |   |   |   |   |
|---|----------|-------|---|---|---|---|---|---|---|---|---|
| S | LA2131   | 91.67 | C | C | A | T | T | C | G | A | A |
| S | A1351    | 91.67 | C | C | A | T | T | C | G | A | G |
| S | A1250    | 91.67 | T | C | A | T | T | C | G | A | A |
| S | LA3267   | 91.67 | C | C | A | T | T | C | A | A | G |
| S | A1348    | 91.67 | T | C | A | T | T | C | A | A | G |
| S | LA3920   | 91.67 | T | C | A | T | T | C | G | A | G |
| S | LA3960   | 91.67 | T | C | A | T | T | C | G | A | G |
| S | A1338    | 92.59 | C | C | A | T | T | C | A | A | G |
| S | A1339    | 92.59 | C | C | A | T | T | C | A | A | G |
| S | LA3051   | 92.59 | C | C | A | T | T | C | A | A | G |
| S | A1317    | 92.59 | T | C | A | T | T | C | A | A | G |
| S | A1337    | 92.59 | C | C | A | T | T | C | A | A | G |
| S | A1291    | 92.59 | T | C | A | T | T | C | A | A | G |
| S | A1342    | 93.33 | T | C | A | T | T | C | G | A | G |
| S | A1341    | 93.33 | T | C | A | T | T | C | A | A | G |
| S | A1201    | 93.33 | T | C | A | T | T | C | G | A | G |
| S | LA3866   | 93.33 | T | C | A | T | T | C | A | A | G |
| S | A1268    | 93.33 | C | C | A | T | Y | C | G | A | G |
| S | LA2076   | 94.44 | C | C | A | T | T | C | A | A | G |
| S | 2K6-8201 | 94.44 | T | C | A | T | T | C | G | A | G |
| S | LA3925   | 94.44 | T | C | A | T | T | C | G | A | G |
| S | A1321    | 95.24 | C | C | A | T | T | C | A | A | G |
| S | A1200    | 95.24 | T | C | A | T | T | C | G | A | G |
| S | LA2163   | 95.24 | C | C | A | Y | T | N | R | A | G |
| S | A1327    | 95.83 | T | C | A | T | T | C | G | A | G |

|   |          |        |   |   |   |   |   |   |   |   |   |
|---|----------|--------|---|---|---|---|---|---|---|---|---|
| S | A1299    | 96.30  | C | C | A | T | T | C | G | A | G |
| S | LA3045   | 96.30  | C | C | A | T | T | C | A | A | G |
| S | A1266    | 96.30  | T | C | A | T | T | C | G | A | G |
| S | LA1547   | 96.30  | C | Y | A | T | T | C | G | A | G |
| S | A1251    | 96.67  | T | C | N | T | T | C | G | A | G |
| S | A1340    | 96.67  | T | C | A | T | T | C | A | A | G |
| S | A1328    | 96.67  | T | C | A | T | T | C | A | A | G |
| S | A1293    | 96.67  | T | C | A | T | T | C | N | A | G |
| S | LA2077   | 100.00 | C | C | A | T | T | N | G | A | G |
| S | LA3137   | 100.00 | C | C | A | T | T | C | A | A | G |
| S | LA2078   | 100.00 | C | C | A | T | T | C | A | G | G |
| S | A1309    | 100.00 | C | C | A | T | T | C | A | A | G |
| S | A1345    | 100.00 | C | C | A | T | T | C | A | A | G |
| S | A1202    | 100.00 | T | C | A | T | T | C | A | A | G |
| S | A1204    | 100.00 | T | C | A | T | T | C | A | A | G |
| S | A1334    | 100.00 | T | C | A | T | T | C | G | A | G |
| S | MM       | 100.00 | C | C | A | T | T | C | A | A | G |
| S | A1329    | 100.00 | C | C | A | T | T | C | G | A | G |
| S | Fla.8233 | 100.00 | C | C | A | T | T | C | A | A | A |
| S | A1326    | 100.00 | C | C | A | T | T | C | G | A | G |
| S | A1298    | 100.00 | C | C | A | T | T | C | A | A | G |
| S | A1297    | 100.00 | C | C | A | T | T | C | A | A | G |
| S | A1330    | 100.00 | T | C | A | T | T | C | A | A | G |
| S | A1331    | 100.00 | T | C | A | T | T | C | A | A | G |
| S | A1319    | 100.00 | T | C | A | T | T | C | R | A | G |

|   |        |        |   |   |   |   |   |   |   |   |   |
|---|--------|--------|---|---|---|---|---|---|---|---|---|
| S | A1343  | 100.00 | T | C | A | T | T | C | A | A | G |
| S | LA3879 | 100.00 | T | C | A | T | T | C | A | A | G |
| S | LA3344 | 100.00 | T | C | A | T | T | C | A | A | G |
| S | LA3867 | 100.00 | T | C | A | T | T | C | A | A | G |
| S | LA3871 | 100.00 | T | C | A | T | T | C | A | A | G |
| S | LA3874 | 100.00 | T | C | A | T | T | C | A | A | G |
| S | LA4246 | 100.00 | T | C | A | T | T | C | A | A | G |
| S | LA4266 | 100.00 | T | C | A | T | T | C | A | A | G |
| S | A1285  | 100.00 | C | C | A | T | T | C | A | A | G |
| S | LA3345 | 100.00 | T | C | A | T | T | C | G | A | G |
| S | A1322  | 100.00 | C | C | A | T | T | C | G | A | G |
| S | A1346  | 100.00 | C | C | A | T | T | C | G | A | G |
| S | A1347  | 100.00 | C | C | A | T | T | C | G | A | G |
| S | A1325  | 100.00 | C | C | N | T | T | C | G | A | G |
| S | A1320  | 100.00 | C | C | A | T | T | C | A | A | G |
| S | A1300  | 100.00 | C | C | A | T | T | C | G | A | G |
| S | A1344  | 100.00 | C | C | A | T | T | C | G | A | G |
| S | LA3246 | 100.00 | C | C | A | T | T | C | A | A | G |
| S | A1295  | 100.00 | T | C | A | T | T | C | G | A | G |
| S | A1311  | 100.00 | C | C | A | T | T | C | A | A | G |

<sup>a</sup> N : SNP call missing; Y : C/T heterozygosity allele; R : A/G heterozygosity allele; M : A/C heterozygosity allele
