# Supplementary material for: Germplasm Screening Using DNA Markers and Genome-Wide Association Study for the Identification of Powdery Mildew Resistance Loci in Tomato
Source: MDPI journal article supplement (doi:10.3390/ijms232113610), 2022-11-06
Supplement: s1 [file s1]

Table S2. Dish QC (DQC), call rate, heterozygosity rate information for each sample of 182 accessions used for single nucleotide polymorphism (SNP) quality control.

| Sample         | Species                                        | DQC  | Call rate (%) | Heterozygosity rate (%) |
|----------------|------------------------------------------------|------|---------------|-------------------------|
| AVTO98039      | <i>S. lycopersicum</i>                         | 0.97 | 97.25         | 6.47                    |
| BT0902         | <i>S. lycopersicum</i>                         | 0.77 | 96.80         | 6.81                    |
| BT0909         | <i>S. lycopersicum</i>                         | 0.96 | 95.63         | 8.57                    |
| BT0911         | <i>S. lycopersicum</i>                         | 0.78 | 92.25         | 9.77                    |
| BT0912         | <i>S. lycopersicum</i>                         | 1.00 | 95.88         | 9.23                    |
| Edkawi         | <i>S. lycopersicum</i>                         | 1.00 | 97.76         | 2.45                    |
| Fla.8233       | <i>S. lycopersicum</i>                         | 0.97 | 98.21         | 2.91                    |
| Floradel       | <i>S. lycopersicum</i>                         | 1.00 | 96.87         | 3.75                    |
| Florida MH-1   | <i>S. lycopersicum</i>                         | 1.00 | 97.96         | 2.52                    |
| Green Doctor   | <i>S. lycopersicum</i>                         | 0.79 | 97.06         | 6.55                    |
| King Humbert#1 | <i>S. lycopersicum</i>                         | 0.99 | 96.62         | 3.30                    |
| KNU2           | <i>S. lycopersicum</i>                         | 0.94 | 91.56         | 13.16                   |
| KNU11          | <i>S. lycopersicum</i>                         | 0.73 | 92.07         | 12.56                   |
| KNU14-1        | <i>S. lycopersicum</i>                         | 0.97 | 95.27         | 4.90                    |
| KNU15          | <i>S. lycopersicum</i>                         | 0.98 | 95.83         | 6.07                    |
| KNU16          | <i>S. lycopersicum</i>                         | 0.96 | 96.30         | 3.62                    |
| KNU17          | <i>S. lycopersicum</i>                         | 0.96 | 97.93         | 4.53                    |
| LA0172         | <i>S. lycopersicum</i> var. <i>cerasiforme</i> | 0.98 | 98.12         | 2.75                    |
| LA0292         | <i>S. lycopersicum</i> var. <i>cerasiforme</i> | 0.95 | 95.31         | 5.78                    |
| LA0373         | <i>S. pimpinellifolium</i>                     | 0.03 | 94.89         | 15.99                   |
| LA0407         | <i>S. habrochaites</i>                         | 0.03 | 90.94         | 34.14                   |
| LA0446         | <i>S. peruvianum</i>                           | 0.03 | 90.16         | 30.54                   |
| LA0716         | <i>S. pennellii</i>                            | 0.02 | 91.16         | 32.07                   |
| LA0722         | <i>S. pimpinellifolium</i>                     | 0.01 | 93.45         | 12.59                   |
| LA1028         | <i>S. chmielewskii</i>                         | 0.04 | 92.01         | 24.53                   |
| LA1141         | <i>S. galapagense</i>                          | 0.14 | 95.51         | 7.53                    |
| LA1208         | <i>S. lycopersicum</i> var. <i>cerasiforme</i> | 0.98 | 94.21         | 5.77                    |
| LA1218         | <i>S. lycopersicum</i> var. <i>cerasiforme</i> | 0.95 | 97.86         | 2.92                    |
| LA1228         | <i>S. lycopersicum</i> var. <i>cerasiforme</i> | 0.90 | 94.01         | 6.49                    |
| LA1237         | <i>S. pimpinellifolium</i>                     | 0.16 | 96.53         | 6.58                    |
| LA1246         | <i>S. pimpinellifolium</i>                     | 0.02 | 95.61         | 8.38                    |
| LA1269         | <i>S. pimpinellifolium</i>                     | 0.95 | 95.89         | 4.21                    |
| LA1272         | <i>S. pennellii</i>                            | 0.03 | 90.89         | 31.09                   |
| LA1274         | <i>S. corneliomulleri</i>                      | 0.04 | 90.88         | 26.52                   |
| LA1283         | <i>S. corneliomulleri</i>                      | 0.04 | 90.36         | 29.05                   |
| LA1290         | <i>S. lycopersicum</i> var. <i>cerasiforme</i> | 0.93 | 93.26         | 7.13                    |

|        |                                                |      |       |       |
|--------|------------------------------------------------|------|-------|-------|
| LA1307 | <i>S. lycopersicum</i> var. <i>cerasiforme</i> | 0.83 | 96.88 | 4.96  |
| LA1314 | <i>S. lycopersicum</i> var. <i>cerasiforme</i> | 0.73 | 95.69 | 5.70  |
| LA1322 | <i>S. neorickii</i>                            | 0.05 | 91.81 | 25.76 |
| LA1338 | <i>S. lycopersicum</i> var. <i>cerasiforme</i> | 0.40 | 90.43 | 23.50 |
| LA1340 | <i>S. pennellii</i>                            | 0.02 | 91.59 | 30.38 |
| LA1346 | <i>S. arcanum</i>                              | 0.04 | 91.32 | 25.20 |
| LA1406 | <i>S. cheesmaniae</i>                          | 0.15 | 95.31 | 7.74  |
| LA1455 | <i>S. lycopersicum</i> var. <i>cerasiforme</i> | 0.94 | 90.91 | 14.07 |
| LA1456 | <i>S. lycopersicum</i> var. <i>cerasiforme</i> | 0.19 | 96.61 | 5.82  |
| LA1457 | <i>S. lycopersicum</i> var. <i>cerasiforme</i> | 0.32 | 95.23 | 6.73  |
| LA1461 | <i>S. lycopersicum</i> var. <i>cerasiforme</i> | 0.94 | 98.06 | 2.82  |
| LA1464 | <i>S. lycopersicum</i> var. <i>cerasiforme</i> | 0.95 | 96.25 | 3.84  |
| LA1482 | <i>S. lycopersicum</i> var. <i>cerasiforme</i> | 0.97 | 97.37 | 3.19  |
| LA1512 | <i>S. lycopersicum</i> var. <i>cerasiforme</i> | 0.94 | 98.18 | 2.86  |
| LA1542 | <i>S. lycopersicum</i> var. <i>cerasiforme</i> | 0.94 | 94.20 | 9.21  |
| LA1545 | <i>S. lycopersicum</i> var. <i>cerasiforme</i> | 0.95 | 97.19 | 3.26  |
| LA1547 | <i>S. pimpinellifolium</i>                     | 0.02 | 89.87 | 27.80 |
| LA1549 | <i>S. lycopersicum</i> var. <i>cerasiforme</i> | 0.89 | 95.78 | 4.30  |
| LA1569 | <i>S. lycopersicum</i> var. <i>cerasiforme</i> | 0.89 | 98.07 | 2.96  |
| LA1578 | <i>S. pimpinellifolium</i>                     | 0.00 | 94.00 | 14.45 |
| LA1582 | <i>S. pimpinellifolium</i>                     | 0.01 | 94.23 | 13.91 |
| LA1589 | <i>S. pimpinellifolium</i>                     | 0.00 | 95.76 | 9.47  |
| LA1617 | <i>S. pimpinellifolium</i>                     | 0.04 | 93.23 | 12.84 |
| LA1620 | <i>S. lycopersicum</i> var. <i>cerasiforme</i> | 0.85 | 96.89 | 7.37  |
| LA1621 | <i>S. lycopersicum</i> var. <i>cerasiforme</i> | 0.88 | 91.30 | 12.08 |
| LA1623 | <i>S. lycopersicum</i> var. <i>cerasiforme</i> | 0.95 | 97.82 | 2.84  |
| LA1632 | <i>S. lycopersicum</i> var. <i>cerasiforme</i> | 0.95 | 97.87 | 2.84  |
| LA1654 | <i>S. lycopersicum</i> var. <i>cerasiforme</i> | 0.98 | 94.13 | 9.41  |
| LA1656 | <i>S. pennellii</i>                            | 0.03 | 90.97 | 32.08 |
| LA1668 | <i>S. lycopersicum</i> var. <i>cerasiforme</i> | 0.95 | 97.87 | 2.89  |
| LA1674 | <i>S. pennellii</i>                            | 0.02 | 91.38 | 30.72 |
| LA1701 | <i>S. lycopersicum</i> var. <i>cerasiforme</i> | 0.73 | 91.17 | 19.41 |
| LA1712 | <i>S. lycopersicum</i> var. <i>cerasiforme</i> | 0.89 | 91.99 | 10.29 |
| LA1732 | <i>S. pennellii</i>                            | 0.02 | 89.68 | 33.71 |
| LA1777 | <i>S. habrochaites</i>                         | 0.04 | 91.30 | 29.46 |
| LA1809 | <i>S. pennellii</i>                            | 0.03 | 91.23 | 31.41 |
| LA1912 | <i>S. pennellii</i>                            | 0.02 | 91.35 | 29.93 |
| LA1930 | <i>S. chilense</i>                             | 0.03 | 90.58 | 29.57 |
| LA1941 | <i>S. pennellii</i>                            | 0.02 | 91.23 | 31.31 |
| LA1946 | <i>S. pennellii</i>                            | 0.02 | 89.37 | 34.94 |
| LA1953 | <i>S. lycopersicum</i> var. <i>cerasiforme</i> | 0.84 | 97.79 | 3.35  |

|         |                                                |      |       |       |
|---------|------------------------------------------------|------|-------|-------|
| LA1963  | <i>S.chilense</i>                              | 0.03 | 91.28 | 28.84 |
| LA2076  | <i>S. lycopersicum</i> var. <i>cerasiforme</i> | 0.98 | 97.68 | 2.97  |
| LA2077  | <i>S. lycopersicum</i> var. <i>cerasiforme</i> | 0.98 | 97.81 | 3.30  |
| LA2078  | <i>S. lycopersicum</i> var. <i>cerasiforme</i> | 0.99 | 97.99 | 2.81  |
| LA2093  | <i>S. pimpinellifolium</i>                     | 0.04 | 96.27 | 7.52  |
| LA2099  | <i>S. habrochaites</i>                         | 0.05 | 90.88 | 33.91 |
| LA2126A | <i>S. lycopersicum</i> var. <i>cerasiforme</i> | 0.89 | 97.28 | 3.55  |
| LA2131  | <i>S. lycopersicum</i> var. <i>cerasiforme</i> | 0.82 | 97.57 | 4.14  |
| LA2135  | <i>S. lycopersicum</i> var. <i>cerasiforme</i> | 0.98 | 96.02 | 4.77  |
| LA2137  | <i>S. lycopersicum</i> var. <i>cerasiforme</i> | 0.22 | 95.94 | 6.80  |
| LA2163  | <i>S. arcanum</i>                              | 0.03 | 91.58 | 23.43 |
| LA2181  | <i>S. pimpinellifolium</i>                     | 0.01 | 96.53 | 8.73  |
| LA2184  | <i>S. pimpinellifolium</i>                     | 0.04 | 94.11 | 13.50 |
| LA2185  | <i>S. arcanum</i>                              | 0.03 | 91.95 | 25.42 |
| LA2190  | <i>S. neorickii</i>                            | 0.04 | 91.89 | 24.69 |
| LA2308  | <i>S. lycopersicum</i> var. <i>cerasiforme</i> | 0.92 | 90.06 | 20.60 |
| LA2312  | <i>S. lycopersicum</i> var. <i>cerasiforme</i> | 0.99 | 95.69 | 4.12  |
| LA2411  | <i>S. lycopersicum</i> var. <i>cerasiforme</i> | 0.71 | 98.48 | 2.70  |
| LA2446  | <i>S. lycopersicum</i>                         | 1.00 | 97.57 | 3.54  |
| LA2533  | <i>S. pimpinellifolium</i>                     | 0.31 | 91.44 | 40.22 |
| LA2561  | <i>S. huaylasense</i>                          | 0.04 | 90.06 | 28.10 |
| LA2626  | <i>S. lycopersicum</i> var. <i>cerasiforme</i> | 0.80 | 97.31 | 6.16  |
| LA2632  | <i>S. lycopersicum</i> var. <i>cerasiforme</i> | 0.37 | 91.13 | 28.24 |
| LA2633  | <i>S. lycopersicum</i> var. <i>cerasiforme</i> | 0.16 | 96.65 | 5.56  |
| LA2660  | <i>S. lycopersicum</i> var. <i>cerasiforme</i> | 0.01 | 89.86 | 19.56 |
| LA2663  | <i>S. chmielewskii</i>                         | 0.04 | 90.04 | 29.21 |
| LA2664  | <i>S. lycopersicum</i> var. <i>cerasiforme</i> | 0.99 | 98.55 | 2.40  |
| LA2675  | <i>S. lycopersicum</i> var. <i>cerasiforme</i> | 0.21 | 94.06 | 7.33  |
| LA2744  | <i>S. peruvianum</i>                           | 0.04 | 90.50 | 29.16 |
| LA2779  | <i>S.chilense</i>                              | 0.03 | 91.38 | 28.43 |
| LA2792  | <i>S. lycopersicum</i> var. <i>cerasiforme</i> | 0.43 | 90.78 | 30.45 |
| LA2845  | <i>S. lycopersicum</i> var. <i>cerasiforme</i> | 0.85 | 98.14 | 3.07  |
| LA2852  | <i>S. pimpinellifolium</i>                     | 0.09 | 94.65 | 17.37 |
| LA2880  | <i>S.chilense</i>                              | 0.04 | 90.97 | 30.77 |
| LA2930  | <i>S.chilense</i>                              | 0.03 | 89.98 | 33.50 |
| LA2932  | <i>S.chilense</i>                              | 0.05 | 89.19 | 35.62 |
| LA3043  | <i>S. lycopersicum</i>                         | 1.00 | 98.48 | 3.39  |
| LA3044  | <i>S. lycopersicum</i>                         | 1.00 | 98.19 | 2.59  |
| LA3045  | <i>S. lycopersicum</i>                         | 1.00 | 97.99 | 3.04  |
| LA3047  | <i>S. lycopersicum</i>                         | 1.00 | 98.63 | 2.62  |
| LA3051  | <i>S. lycopersicum</i>                         | 0.99 | 93.84 | 6.41  |

|        |                                                      |      |       |       |
|--------|------------------------------------------------------|------|-------|-------|
| LA3136 | <i>S. lycopersicum</i> var. <i>cerasiforme</i>       | 0.81 | 91.50 | 10.51 |
| LA3137 | <i>S. lycopersicum</i> var. <i>cerasiforme</i>       | 0.98 | 98.13 | 3.95  |
| LA3246 | <i>S. lycopersicum</i>                               | 1.00 | 93.21 | 10.34 |
| LA3267 | <i>S. lycopersicum</i>                               | 1.00 | 97.90 | 3.00  |
| LA3344 | <i>S. lycopersicum</i> ( <i>lycopersicoides</i> ILs) | 0.97 | 97.07 | 2.76  |
| LA3345 | <i>S. lycopersicum</i> ( <i>lycopersicoides</i> ILs) | 0.95 | 95.38 | 10.59 |
| LA3736 | <i>S. lycopersicum</i>                               | 1.00 | 94.46 | 5.27  |
| LA3866 | <i>S. lycopersicum</i> ( <i>lycopersicoides</i> ILs) | 0.97 | 97.38 | 2.52  |
| LA3867 | <i>S. lycopersicum</i> ( <i>lycopersicoides</i> ILs) | 0.97 | 98.53 | 2.05  |
| LA3869 | <i>S. lycopersicum</i> ( <i>lycopersicoides</i> ILs) | 0.97 | 96.61 | 3.20  |
| LA3870 | <i>S. lycopersicum</i> ( <i>lycopersicoides</i> ILs) | 0.92 | 92.59 | 7.90  |
| LA3871 | <i>S. lycopersicum</i> ( <i>lycopersicoides</i> ILs) | 0.97 | 98.85 | 1.94  |
| LA3874 | <i>S. lycopersicum</i> ( <i>lycopersicoides</i> ILs) | 0.96 | 98.12 | 2.25  |
| LA3875 | <i>S. lycopersicum</i> ( <i>lycopersicoides</i> ILs) | 1.00 | 98.54 | 2.62  |
| LA3878 | <i>S. lycopersicum</i> ( <i>lycopersicoides</i> ILs) | 0.96 | 97.92 | 2.30  |
| LA3879 | <i>S. lycopersicum</i> ( <i>lycopersicoides</i> ILs) | 0.95 | 97.91 | 2.56  |
| LA3882 | <i>S. lycopersicum</i> ( <i>lycopersicoides</i> ILs) | 0.96 | 92.86 | 7.52  |
| LA3883 | <i>S. lycopersicum</i> ( <i>lycopersicoides</i> ILs) | 0.96 | 95.39 | 3.82  |
| LA3886 | <i>S. lycopersicum</i> ( <i>lycopersicoides</i> ILs) | 0.97 | 96.11 | 3.23  |
| LA3889 | <i>S. lycopersicum</i> ( <i>lycopersicoides</i> ILs) | 0.97 | 96.28 | 3.34  |
| LA3892 | <i>S. lycopersicum</i> ( <i>lycopersicoides</i> ILs) | 0.97 | 98.79 | 1.94  |
| LA3893 | <i>S. lycopersicum</i> ( <i>lycopersicoides</i> ILs) | 0.94 | 97.31 | 3.24  |
| LA3918 | <i>S. lycopersicum</i> ( <i>habrochaites</i> ILs)    | 0.99 | 98.75 | 2.25  |
| LA3919 | <i>S. lycopersicum</i> ( <i>habrochaites</i> ILs)    | 0.99 | 93.25 | 8.35  |
| LA3920 | <i>S. lycopersicum</i> ( <i>habrochaites</i> ILs)    | 1.00 | 97.22 | 4.39  |
| LA3925 | <i>S. lycopersicum</i> ( <i>habrochaites</i> ILs)    | 0.99 | 95.61 | 3.75  |
| LA3928 | <i>S. lycopersicum</i> ( <i>habrochaites</i> ILs)    | 0.98 | 94.21 | 15.37 |
| LA3951 | <i>S. lycopersicum</i> ( <i>habrochaites</i> ILs)    | 1.00 | 95.73 | 4.06  |
| LA3960 | <i>S. lycopersicum</i> ( <i>habrochaites</i> ILs)    | 0.99 | 94.07 | 6.04  |
| LA3975 | <i>S. lycopersicum</i> ( <i>habrochaites</i> ILs)    | 1.00 | 98.30 | 2.42  |
| LA3997 | <i>S. lycopersicum</i> ( <i>habrochaites</i> ILs)    | 0.99 | 94.40 | 5.74  |
| LA3999 | <i>S. lycopersicum</i> ( <i>habrochaites</i> ILs)    | 1.00 | 96.07 | 6.11  |
| LA4024 | <i>S. lycopersicum</i>                               | 0.99 | 98.20 | 2.60  |
| LA4230 | <i>S. lycopersicum</i> ( <i>lycopersicoides</i> ILs) | 0.98 | 97.51 | 3.50  |
| LA4239 | <i>S. lycopersicum</i> ( <i>lycopersicoides</i> ILs) | 0.94 | 98.21 | 2.20  |
| LA4240 | <i>S. lycopersicum</i> ( <i>lycopersicoides</i> ILs) | 0.97 | 91.96 | 8.79  |
| LA4244 | <i>S. lycopersicum</i> ( <i>lycopersicoides</i> ILs) | 0.97 | 97.22 | 2.87  |
| LA4245 | <i>S. lycopersicum</i> ( <i>lycopersicoides</i> ILs) | 1.00 | 95.38 | 13.63 |
| LA4246 | <i>S. lycopersicum</i> ( <i>lycopersicoides</i> ILs) | 0.97 | 97.22 | 3.12  |
| LA4247 | <i>S. lycopersicum</i> ( <i>lycopersicoides</i> ILs) | 0.96 | 96.31 | 3.27  |
| LA4257 | <i>S. lycopersicum</i> ( <i>lycopersicoides</i> ILs) | 0.93 | 90.69 | 14.51 |

|          |                                                |      |       |       |
|----------|------------------------------------------------|------|-------|-------|
| LA4264   | <i>S. lycopersicum (lycopersicoides ILs)</i>   | 0.97 | 98.60 | 1.99  |
| LA4266   | <i>S. lycopersicum (lycopersicoides ILs)</i>   | 0.97 | 95.54 | 3.67  |
| LA4270   | <i>S. lycopersicum (lycopersicoides ILs)</i>   | 0.97 | 95.58 | 4.26  |
| LA4271   | <i>S. lycopersicum (lycopersicoides ILs)</i>   | 0.97 | 98.56 | 2.08  |
| LA4279   | <i>S. lycopersicum (lycopersicoides ILs)</i>   | 0.98 | 98.39 | 2.09  |
| LA4282   | <i>S. lycopersicum (lycopersicoides ILs)</i>   | 0.97 | 96.59 | 3.34  |
| PI126434 | <i>S. corneliomulleri</i>                      | 0.03 | 90.80 | 26.67 |
| PI126445 | <i>S. habrochaites</i>                         | 0.03 | 91.16 | 32.60 |
| PI126925 | <i>S. pimpinellifolium</i>                     | 0.01 | 94.50 | 17.41 |
| PI127827 | <i>S. habrochaites</i>                         | 0.03 | 90.23 | 34.94 |
| PI128216 | <i>S. pimpinellifolium</i>                     | 0.00 | 96.22 | 9.20  |
| PI134417 | <i>S. habrochaites</i>                         | 0.03 | 91.02 | 34.93 |
| PI134418 | <i>S. habrochaites</i>                         | 0.03 | 91.30 | 33.52 |
| PI180721 | <i>S. lycopersicum</i>                         | 1.00 | 98.46 | 2.42  |
| PI205037 | <i>S. lycopersicum</i>                         | 0.99 | 96.62 | 3.14  |
| PI254655 | <i>S. lycopersicum</i>                         | 0.69 | 91.26 | 12.45 |
| PI296363 | <i>S. lycopersicum</i>                         | 1.00 | 93.03 | 7.70  |
| PI308182 | <i>S. habrochaites</i>                         | 0.03 | 91.14 | 34.04 |
| SAL1875  | <i>S. pimpinellifolium</i>                     | 0.01 | 88.64 | 27.63 |
| 2K6-8040 | <i>S. lycopersicum</i>                         | 0.95 | 98.13 | 2.83  |
| 2K6-8201 | <i>S. lycopersicum</i>                         | 0.97 | 98.62 | 2.84  |
| Trujillo | <i>S. lycopersicum</i> var. <i>cerasiforme</i> | 0.73 | 97.35 | 4.25  |
| Walter   | <i>S. lycopersicum</i>                         | 1.00 | 98.18 | 3.31  |

---
