# Supplementary material for: Germplasm Screening Using DNA Markers and Genome-Wide Association Study for the Identification of Powdery Mildew Resistance Loci in Tomato
Source: MDPI journal article supplement (doi:10.3390/ijms232113610), 2022-11-06
Supplement: s1 [file s1]

Table S4. Single nucleotide polymorphisms (SNPs) selected for significant association ( $-\log_{10}(P) > 3$ ) with the powdery mildew resistance (PMR) in tomato, upon carrying out a genome-wide association study.

| SNP<br>Marker <sup>a</sup> | SNP<br>allele <sup>b</sup><br>(major/<br>minor) | Position <sup>c</sup> |            | $-\log_{10}(P)$ |        | Gene annotation <sup>d</sup> |                              | FDR<br>adjusted<br><i>P</i> -values | <i>R</i> <sup>2</sup> (%) <sup>e</sup> |
|----------------------------|-------------------------------------------------|-----------------------|------------|-----------------|--------|------------------------------|------------------------------|-------------------------------------|----------------------------------------|
|                            |                                                 | Chr                   | bp         | GAPIT           | TASSEL | Gene ID                      | Gene function                |                                     |                                        |
| AX-95811257                | T/C                                             | 1                     | 72,655,237 | 3.36            | 3.18   | Solyc01g009700.3.1           | NL0E                         | 0.4742                              | 5.22%                                  |
| AX-95805394                | C/T                                             | 1                     | 72,661,165 | 3.29            | -      | Intergenic region            | -                            | 0.4742                              | 3.71%                                  |
| AX-95777655                | C/A                                             | 1                     | 72,696,985 | 3.10            | -      | Solyc01g080870.3.1           | Protein NRT1/ PTR FAMILY 7.3 | 0.5635                              | 3.88%                                  |
| AX-95779967                | T/C                                             | 1                     | 72,697,146 | 3.36            | -      | Solyc01g080870.3.1           | Protein NRT1/ PTR FAMILY 7.3 | 0.4742                              | 4.43%                                  |
| AX-95804580                | C/T                                             | 2                     | 37,742,382 | -               | 3.47   | Intergenic region            | -                            | 0.9167                              | 4.43%                                  |
| AX-95803738                | C/T                                             | 4                     | 5,920,027  | 3.54            | 3.16   | Intergenic region            | -                            | 0.4742                              | 5.31%                                  |

|             |     |   |            |      |      |                    |                                                  |        |       |
|-------------|-----|---|------------|------|------|--------------------|--------------------------------------------------|--------|-------|
| AX-95788484 | G/A | 4 | 5,997,381  | 3.02 | -    | Solyc04g015690.4.1 | Insulinase (Peptidase family M16) family protein | 0.5732 | 4.32% |
| AX-95799308 | A/G | 4 | 6,001,287  | 3.39 | 3.35 | Solyc04g015730.3.1 | Hypothetical protein                             | 0.4742 | 5.66% |
| AX-95776428 | T/C | 4 | 6,006,978  | 3.77 | 3.28 | Intergenic region  | -                                                | 0.4742 | 5.51% |
| AX-95799144 | C/T | 4 | 6,007,262  | 3.35 | -    | Solyc04g015700.1.1 | Hypothetical protein                             | 0.4742 | 4.43% |
| AX-95773950 | G/A | 4 | 6,008,475  | 3.03 | -    | Solyc04g015705.1.1 | Unknown protein                                  | 0.5732 | 4.10% |
| AX-95771531 | T/C | 4 | 6,009,028  | 4.41 | 3.93 | Solyc04g015710.3.1 | Dentin sialophosphoprotein-like protein          | 0.4648 | 6.55% |
| AX-95806639 | G/T | 4 | 6,009,194  | 3.59 | -    | Solyc04g015710.3.1 | Dentin sialophosphoprotein-like protein          | 0.4742 | 4.11% |
| AX-95790579 | C/G | 4 | 6,022,767  | -    | 4.23 | Intergenic region  | -                                                | 0.9167 | 7.11% |
| AX-95783448 | C/A | 4 | 6,023,073  | 3.30 | 3.76 | Solyc04g015730.3.1 | Hypothetical protein                             | 0.4742 | 6.53% |
| AX-95775687 | G/C | 6 | 34,025,307 | 3.51 | -    | Solyc06g059750.3.1 | Transcriptional corepressor SEUSS                | 0.4742 | 4.09% |

|             |     |    |            |      |      |                    |                                                                  |        |       |
|-------------|-----|----|------------|------|------|--------------------|------------------------------------------------------------------|--------|-------|
| AX-95797861 | A/C | 6  | 41,603,822 | 3.07 | -    | Intergenic region  | -                                                                | 0.5635 | 4.09% |
| AX-95786699 | T/C | 6  | 43,282,486 | 3.07 | -    | Intergenic region  | -                                                                | 0.5635 | 4.41% |
| AX-95813371 | G/A | 6  | 45,685,033 | 3.92 | 3.39 | Solyc06g084210.3.1 | Sec24-like transport protein                                     | 0.4742 | 5.71% |
| AX-95790369 | T/A | 8  | 2,923,332  | 3.07 | -    | Intergenic region  | -                                                                | 0.5635 | 4.31% |
| AX-95810925 | A/G | 8  | 56,274,173 | 3.73 | 4.57 | Solyc08g074980.4.1 | Receptor-like serine/threonine-protein kinase                    | 0.4742 | 7.68% |
| AX-95789984 | A/G | 10 | 2,629,440  | -    | 3.69 | Solyc10g150103.1.1 | Unknown protein                                                  | 1.0000 | 6.31% |
| AX-95780990 | T/C | 11 | 5,353,985  | -    | 3.12 | Solyc11g012540.2.1 | F-box/kelch-repeat protein                                       | 1.0000 | 5.20% |
| AX-95813498 | A/G | 11 | 5,505,866  | -    | 3.04 | Solyc11g012740.2.1 | Regulation of nuclear pre-mRNA domain-containing protein 1B-like | 1.0000 | 4.99% |
| AX-95801454 | G/A | 12 | 18,875,528 | 3.13 | 3.37 | Intergenic region  | -                                                                | 0.5635 | 5.65% |

<sup>a</sup>SNP markers highlighted in red are significant SNPs commonly identified from TASSEL and GAPIT.

<sup>b</sup>Minor alleles are the allele favorable for the resistance.

<sup>c</sup>Positions were determined based on the ‘Heinz 1706’ reference genome assembly SL2.40 from the Sol Genomics Network (SGN, <https://solgenomics.net/>)..

<sup>d</sup>Gene annotation information were obtained from ‘Heinz 1706’ reference genome assembly SL4.0 (ITAG4.0) from the SGN.

<sup>e</sup>Proportion of phenotypic variance explained by SNP.
