# Supplementary material for: Germplasm Screening Using DNA Markers and Genome-Wide Association Study for the Identification of Powdery Mildew Resistance Loci in Tomato
Source: MDPI journal article supplement (doi:10.3390/ijms232113610), 2022-11-06
Supplement: s1 [file s1]

Table S6. List of annotated genes in tomato powdery mildew resistance (PMR)-associated QTL-2 (Chr.4, 5.87-6.07 Mb) and QTL-4 region (Chr. 8, 57.17-57.27 Mb) containing two significant SNPs AX-95771531, AX-95810925, respectively.

| QTL  | Annotated gene     | Description                                                   | Location <sup>a</sup>                 |
|------|--------------------|---------------------------------------------------------------|---------------------------------------|
| QTL2 | Solyc04g015580.3.1 | Arm repeat superfamily protein                                | SL4.0ch04:5898847..5912928 (+ strand) |
|      | Solyc04g150111.1.1 | ozone-responsive stress-like protein                          | SL4.0ch04:5915991..5920041 (+ strand) |
|      | Solyc04g015590.4.1 | Bifunctional polymyxin resistance protein                     | SL4.0ch04:5920967..5924001 (+ strand) |
|      | Solyc04g015600.3.1 | Leucine-rich repeat receptor-like tyrosine-protein kinase     | SL4.0ch04:5925036..5928968 (- strand) |
|      | Solyc04g015610.3.1 | DUF642 domain-containing protein                              | SL4.0ch04:5951876..5954495 (+ strand) |
|      | Solyc04g015620.3.1 | DUF642 domain-containing protein                              | SL4.0ch04:5956173..5958700 (+ strand) |
|      | Solyc04g015630.2.1 | NBS-LRR resistance-like protein                               | SL4.0ch04:5958826..5960648 (- strand) |
|      | Solyc04g015640.1.1 | Disease resistance protein rga3-like                          | SL4.0ch04:5960830..5961533 (- strand) |
|      | Solyc04g015635.2.1 | zinc finger BED domain-containing protein RICESLEEPER 2-like  | SL4.0ch04:5964230..5966957 (- strand) |
|      | Solyc04g015660.3.1 | Serine/threonine-protein phosphatase 7 long form-like protein | SL4.0ch04:5975854..5979767 (+ strand) |
|      | Solyc04g015680.3.1 | insulin degrading enzyme                                      | SL4.0ch04:5987660..6008485 (+ strand) |
|      | Solyc04g015690.4.1 | Insulinase (Peptidase family M16) family protein              | SL4.0ch04:6009299..6036845 (+ strand) |

|      |                    |                                                             |                                         |
|------|--------------------|-------------------------------------------------------------|-----------------------------------------|
|      | Solyc04g015700.1.1 | hypothetical protein                                        | SL4.0ch04:6038345..6038605 (- strand)   |
|      | Solyc04g015705.1.1 | Unknown protein                                             | SL4.0ch04:6038617..6039791 (- strand)   |
|      | Solyc04g015710.3.1 | dentin sialophosphoprotein-like protein                     | SL4.0ch04:6040060..6044288 (- strand)   |
|      | Solyc04g015720.2.1 | Unknown protein                                             | SL4.0ch04:6045160..6048157 (- strand)   |
|      | Solyc04g015730.3.1 | hypothetical protein                                        | SL4.0ch04:6053951..6055765 (- strand)   |
|      | Solyc04g015740.3.1 | transmembrane protein, putative                             | SL4.0ch04:6059620..6064860 (+ strand)   |
|      | Solyc04g015750.3.1 | CobN/magnesium chelata                                      | SL4.0ch04:6065261..6071195 (- strand)   |
|      | Solyc04g015760.4.1 | Protein N-terminal glutamine amidohydrolase                 | SL4.0ch04:6077102..6082474 (- strand)   |
|      | Solyc04g015770.1.1 | Protein N-terminal glutamine amidohydrolase                 | SL4.0ch04:6098769..6099434 (- strand)   |
|      | Solyc04g015780.1.1 | Protein N-terminal glutamine                                | SL4.0ch04:6101307..6101861 (- strand)   |
| QTL4 | Solyc08g074913.1.1 | aspartic proteinase CDR1-like                               | SL4.0ch08:57171187..57172624 (- strand) |
|      | Solyc08g074917.1.1 | Eukaryotic aspartyl protease family protein                 | SL4.0ch08:57181223..57184722 (- strand) |
|      | Solyc08g074950.2.1 | Pectin acetylesterase                                       | SL4.0ch08:57192306..57194206 (- strand) |
|      | Solyc08g074955.1.1 | Retrovirus-related Pol polyprotein from transposon TNT 1-94 | SL4.0ch08:57198793..57199961 (- strand) |
|      | Solyc08g074960.3.1 | Major facilitator superfamily protein                       | SL4.0ch08:57211488..57215525 (+ strand) |

|                    |                                               |                                         |
|--------------------|-----------------------------------------------|-----------------------------------------|
| Solyc08g074970.1.1 | UDP-Glycosyltransferase superfamily protein   | SL4.0ch08:57216128..57217573 (- strand) |
| Solyc08g074980.4.1 | Receptor-like serine/threonine-protein kinase | SL4.0ch08:57220024..57223006 (- strand) |
| Solyc08g074990.3.1 | Pectin acetylesterase                         | SL4.0ch08:57241396..57243647 (+ strand) |
| Solyc08g075010.4.1 | DNAse I-like superfamily protein              | SL4.0ch08:57258645..57269780 (- strand) |

---

<sup>a</sup>Physical location based on the SGN SL4.0 assemb
