# Supplementary material for: Germplasm Screening Using DNA Markers and Genome-Wide Association Study for the Identification of Powdery Mildew Resistance Loci in Tomato
Source: MDPI journal article supplement (doi:10.3390/ijms232113610), 2022-11-06
Supplement: s1 [file s1]

Table S7. The genotyping results reconfirmed by converting chip single nucleotide polymorphisms (SNPs) AX-95809404 and AX-95781958 into cleaved amplified polymorphic sequence (CAPS) markers to 290 accessions used in the genome-wide association study (GWAS).

| Phenotype | Accession | PDI (%) | SNPs        |             |
|-----------|-----------|---------|-------------|-------------|
|           |           |         | AX-95781958 | AX-95809404 |
| R         | KNU17     | 0.00    | T           | A           |
| R         | A1161     | 0.00    | T           | A           |
| R         | A1162     | 0.00    | T           | A           |
| R         | A1216     | 0.00    | C           | G           |
| R         | LA1963    | 0.00    | T           | A           |
| R         | LA2932    | 0.00    | T           | A           |
| R         | LA2663    | 0.00    | T           | A           |
| R         | LA1274    | 0.00    | T           | A           |
| R         | LA1141    | 0.00    | T           | G           |
| R         | PI126445  | 0.00    | T           | A           |
| R         | LA1272    | 0.00    | T           | A           |
| R         | LA1674    | 0.00    | T           | A           |
| R         | LA1809    | 0.00    | T           | A           |
| R         | LA2744    | 0.00    | T           | A           |
| R         | LA2181    | 0.00    | T           | G           |
| R         | KNU16     | 4.76    | T           | A           |
| R         | LA0716    | 4.76    | T           | A           |
| R         | LA1340    | 5.56    | T           | A           |
| R         | LA2184    | 5.56    | T           | G           |
| R         | PI308182  | 6.67    | T           | A           |
| R         | PI134418  | 8.33    | T           | A           |
| R         | A1164     | 9.52    | T           | A           |
| MR        | A1155     | 11.11   | C           | G           |
| MR        | A1168     | 11.11   | Y           | R           |

|    |           |       |   |   |
|----|-----------|-------|---|---|
| MR | LA2852    | 11.11 | C | G |
| MR | A1189     | 12.50 | T | A |
| MR | A1170     | 13.33 | C | G |
| MR | LA0722    | 13.33 | T | A |
| MR | LA1461    | 14.29 | T | A |
| MR | PI180721  | 14.81 | T | A |
| MR | A1165     | 16.67 | C | G |
| MR | A1169     | 16.67 | C | G |
| MR | LA0407    | 16.67 | T | A |
| MR | LA1777    | 16.67 | T | A |
| MR | PI134417  | 16.67 | T | A |
| MR | LA2312    | 19.05 | C | G |
| MR | A1156     | 19.05 | T | A |
| MR | LA1457    | 20.00 | T | A |
| MR | A1151     | 20.00 | C | G |
| MR | LA2185    | 20.00 | T | A |
| MR | BT0911    | 20.83 | C | G |
| MR | KNU11     | 22.22 | T | A |
| MR | PI205037  | 22.22 | C | G |
| MR | A1167     | 22.22 | C | G |
| MR | A1173     | 22.22 | C | G |
| MR | A1206     | 22.22 | C | G |
| MR | A1208     | 22.22 | C | G |
| MR | A1217     | 22.22 | C | G |
| MR | LA1582    | 22.22 | T | A |
| MR | A1236     | 23.33 | C | G |
| MR | AVTO98039 | 25.00 | T | A |
| MR | A1248     | 25.00 | C | G |
| MR | A1234     | 25.93 | C | G |

|    |          |       |   |   |
|----|----------|-------|---|---|
| MR | A1260    | 26.67 | T | A |
| MR | LA1455   | 27.78 | T | A |
| MR | A1198    | 27.78 | C | G |
| MR | LA2779   | 27.78 | T | A |
| MR | LA1246   | 27.78 | T | A |
| MR | A1222    | 28.57 | C | G |
| MR | LA4245   | 29.17 | C | G |
| MR | A1163    | 29.17 | T | A |
| MR | A1219    | 29.17 | C | G |
| MR | A1227    | 29.17 | C | G |
| MR | A1246    | 29.17 | C | G |
| MR | A1247    | 29.17 | C | G |
| MR | LA1028   | 29.17 | T | A |
| MR | LA1941   | 29.17 | T | A |
| MR | LA1578   | 29.17 | T | A |
| MR | A1215    | 29.63 | C | G |
| MR | LA1512   | 33.33 | T | A |
| MR | LA2626   | 33.33 | C | G |
| MR | LA2308   | 33.33 | T | A |
| MR | BT0902   | 33.33 | T | A |
| MR | BT0912   | 33.33 | C | G |
| MR | PI254655 | 33.33 | T | A |
| MR | A1157    | 33.33 | C | G |
| MR | A1199    | 33.33 | T | A |
| MR | A1223    | 33.33 | C | G |
| MR | A1237    | 33.33 | C | G |
| MR | A1243    | 33.33 | T | A |
| MR | LA1406   | 33.33 | T | G |
| MR | LA1930   | 33.33 | T | A |

|    |          |       |   |   |
|----|----------|-------|---|---|
| MR | LA1946   | 33.33 | T | A |
| MR | LA2533   | 33.33 | Y | R |
| MR | A1207    | 36.67 | C | G |
| MR | A1245    | 36.67 | C | G |
| MR | A1244    | 37.04 | C | G |
| MR | A1254    | 37.50 | C | G |
| MR | LA1912   | 37.50 | T | A |
| MR | LA3875   | 38.10 | T | A |
| MR | A1187    | 38.10 | C | G |
| MR | A1195    | 38.10 | C | G |
| MR | A1218    | 38.10 | C | G |
| MR | LA1208   | 38.89 | C | G |
| MR | LA2845   | 38.89 | C | G |
| MR | A1270    | 38.89 | C | G |
| MR | LA0172   | 40.00 | T | A |
| MR | A1160    | 40.00 | C | G |
| MR | A1261    | 40.00 | T | A |
| S  | A1258    | 40.74 | C | G |
| S  | LA2561   | 40.74 | T | A |
| S  | A1205    | 41.67 | C | G |
| S  | A1226    | 41.67 | C | G |
| S  | LA1338   | 42.86 | T | A |
| S  | BT0909   | 42.86 | T | A |
| S  | LA1228   | 42.86 | T | A |
| S  | A1191    | 42.86 | C | G |
| S  | LA1701   | 44.44 | C | G |
| S  | LA4239   | 44.44 | C | G |
| S  | PI128216 | 44.44 | T | A |
| S  | LA1732   | 44.44 | T | A |

|   |          |       |   |   |
|---|----------|-------|---|---|
| S | LA1668   | 45.83 | T | A |
| S | A1238    | 45.83 | C | G |
| S | Walter   | 46.67 | C | G |
| S | A1152    | 46.67 | C | G |
| S | A1211    | 46.67 | C | G |
| S | A1225    | 46.67 | C | G |
| S | A1159    | 47.62 | C | G |
| S | A1283    | 48.15 | C | G |
| S | LA2633   | 50.00 | T | A |
| S | Floradel | 50.00 | C | G |
| S | LA4230   | 50.00 | C | G |
| S | A1175    | 50.00 | C | G |
| S | A1196    | 50.00 | C | G |
| S | A1209    | 50.00 | C | G |
| S | A1228    | 50.00 | C | G |
| S | PI126925 | 50.00 | T | A |
| S | SAL1875  | 50.00 | T | A |
| S | LA4024   | 51.85 | C | G |
| S | A1193    | 51.85 | C | G |
| S | A1289    | 51.85 | C | G |
| S | LA4247   | 52.38 | C | G |
| S | LA1712   | 54.17 | C | A |
| S | A1212    | 54.17 | C | G |
| S | LA1464   | 55.56 | C | G |
| S | LA4244   | 55.56 | C | G |
| S | A1180    | 55.56 | C | G |
| S | A1287    | 55.56 | C | G |
| S | A1354    | 55.56 | C | G |
| S | LA0446   | 55.56 | T | A |

|   |        |       |   |   |
|---|--------|-------|---|---|
| S | A1262  | 56.67 | C | G |
| S | A1315  | 56.67 | C | G |
| S | LA1542 | 57.14 | T | A |
| S | LA3136 | 57.14 | T | A |
| S | A1172  | 57.14 | C | G |
| S | LA4271 | 58.33 | C | G |
| S | LA4279 | 58.33 | C | G |
| S | A1263  | 58.33 | C | G |
| S | A1312  | 58.33 | C | G |
| S | A1356  | 58.33 | C | G |
| S | A1255  | 60.00 | C | G |
| S | A1314  | 60.00 | T | A |
| S | A1259  | 61.11 | C | G |
| S | LA1589 | 61.11 | T | A |
| S | LA1621 | 61.90 | T | A |
| S | LA3043 | 61.90 | C | G |
| S | A1231  | 61.90 | C | G |
| S | A1269  | 61.90 | T | A |
| S | LA0373 | 61.90 | Y | R |
| S | LA1545 | 62.96 | T | A |
| S | A1158  | 62.96 | C | G |
| S | A1233  | 62.96 | C | G |
| S | A1252  | 62.96 | C | G |
| S | A1281  | 62.96 | C | G |
| S | LA1569 | 66.67 | T | A |
| S | LA1623 | 66.67 | T | A |
| S | LA1456 | 66.67 | T | A |
| S | LA3882 | 66.67 | C | G |
| S | A1224  | 66.67 | C | G |

|   |                |       |   |   |
|---|----------------|-------|---|---|
| S | A1232          | 66.67 | C | G |
| S | A1257          | 66.67 | C | G |
| S | A1275          | 66.67 | C | G |
| S | A1349          | 66.67 | C | G |
| S | PI126434       | 66.67 | T | A |
| S | LA3892         | 70.00 | C | G |
| S | LA1654         | 70.37 | T | R |
| S | LA3878         | 70.37 | C | G |
| S | A1256          | 70.37 | C | G |
| S | A1355          | 70.37 | C | G |
| S | A1230          | 71.43 | C | G |
| S | A1203          | 72.22 | C | G |
| S | A1229          | 72.22 | C | G |
| S | A1353          | 72.22 | C | G |
| S | A1276          | 73.33 | C | G |
| S | LA2126A        | 74.07 | C | G |
| S | King Humbert#1 | 75.00 | T | A |
| S | PI296363       | 75.00 | C | G |
| S | LA3999         | 75.00 | C | G |
| S | Trujillo       | 76.67 | C | G |
| S | LA1549         | 77.78 | T | A |
| S | LA1632         | 77.78 | T | A |
| S | 2K6-8040       | 77.78 | C | G |
| S | A1357          | 77.78 | C | G |
| S | A1240          | 80.00 | C | G |
| S | A1333          | 80.00 | C | G |
| S | LA1346         | 80.00 | T | A |
| S | LA3918         | 80.95 | C | G |
| S | LA3928         | 80.95 | C | R |

|   |        |       |   |   |
|---|--------|-------|---|---|
| S | LA3997 | 80.95 | C | G |
| S | LA4264 | 81.48 | C | G |
| S | A1241  | 81.48 | C | G |
| S | A1308  | 81.48 | C | G |
| S | A1267  | 83.33 | T | A |
| S | A1313  | 83.33 | C | G |
| S | LA1283 | 83.33 | T | A |
| S | A1296  | 85.19 | C | G |
| S | LA2664 | 85.71 | C | G |
| S | LA1953 | 86.67 | T | A |
| S | A1336  | 86.67 | C | G |
| S | LA3975 | 86.67 | C | G |
| S | LA2137 | 87.50 | C | G |
| S | A1264  | 87.50 | C | G |
| S | A1316  | 87.50 | C | G |
| S | LA3869 | 88.89 | C | G |
| S | A1210  | 88.89 | C | G |
| S | A1265  | 88.89 | C | G |
| S | A1280  | 88.89 | C | G |
| S | A1350  | 90.00 | C | G |
| S | LA3047 | 90.48 | C | G |
| S | LA2131 | 91.67 | C | G |
| S | LA2135 | 91.67 | C | G |
| S | LA3267 | 91.67 | C | G |
| S | A1250  | 91.67 | C | G |
| S | A1348  | 91.67 | C | G |
| S | A1351  | 91.67 | C | G |
| S | LA3920 | 91.67 | C | G |
| S | LA3960 | 91.67 | C | G |



|   |          |        |   |   |
|---|----------|--------|---|---|
| S | LA3051   | 92.59  | C | G |
| S | A1291    | 92.59  | C | G |
| S | A1317    | 92.59  | C | G |
| S | A1337    | 92.59  | C | G |
| S | A1338    | 92.59  | C | G |
| S | A1339    | 92.59  | C | G |
| S | LA3866   | 93.33  | C | G |
| S | A1201    | 93.33  | C | G |
| S | A1268    | 93.33  | T | A |
| S | A1341    | 93.33  | C | G |
| S | A1342    | 93.33  | T | A |
| S | LA2076   | 94.44  | C | G |
| S | 2K6-8201 | 94.44  | C | G |
| S | LA3925   | 94.44  | C | G |
| S | A1200    | 95.24  | C | G |
| S | A1321    | 95.24  | C | G |
| S | LA2163   | 95.24  | T | A |
| S | A1327    | 95.83  | C | G |
| S | LA3045   | 96.30  | C | G |
| S | A1266    | 96.30  | C | G |
| S | A1299    | 96.30  | C | G |
| S | LA1547   | 96.30  | T | R |
| S | A1251    | 96.67  | C | G |
| S | A1293    | 96.67  | C | G |
| S | A1328    | 96.67  | C | G |
| S | A1340    | 96.67  | C | G |
| S | LA2077   | 100.00 | C | G |
| S | LA2078   | 100.00 | T | A |
| S | LA3137   | 100.00 | C | G |

|   |          |        |   |   |
|---|----------|--------|---|---|
| S | Fla.8233 | 100.00 | C | G |
| S | LA3246   | 100.00 | C | G |
| S | LA3344   | 100.00 | C | G |
| S | LA3345   | 100.00 | C | G |
| S | LA3867   | 100.00 | C | G |
| S | LA3871   | 100.00 | C | G |
| S | LA3874   | 100.00 | C | G |
| S | LA3879   | 100.00 | C | G |
| S | LA4246   | 100.00 | C | G |
| S | LA4266   | 100.00 | C | G |
| S | A1202    | 100.00 | C | G |
| S | A1204    | 100.00 | C | G |
| S | A1285    | 100.00 | C | G |
| S | A1295    | 100.00 | C | G |
| S | A1297    | 100.00 | C | G |
| S | A1298    | 100.00 | C | G |
| S | A1300    | 100.00 | C | G |
| S | A1309    | 100.00 | C | G |
| S | A1311    | 100.00 | C | G |
| S | A1319    | 100.00 | C | G |
| S | A1320    | 100.00 | C | G |
| S | A1322    | 100.00 | C | G |
| S | A1325    | 100.00 | C | G |
| S | A1326    | 100.00 | C | G |
| S | A1329    | 100.00 | C | G |
| S | A1330    | 100.00 | C | G |
| S | A1331    | 100.00 | C | G |
| S | A1334    | 100.00 | C | G |
| S | A1343    | 100.00 | C | G |

|   |       |        |   |   |
|---|-------|--------|---|---|
| S | A1344 | 100.00 | C | G |
| S | A1345 | 100.00 | C | G |
| S | A1346 | 100.00 | C | G |
| S | A1347 | 100.00 | C | G |
| S | MM    | 100.00 | C | G |

---
